# Supplementary material
Source: PubMed Central journal article supplement (PMC4351360)

**Fig 1.** Summary of crossreactive networks in vitro generated and in vivo T cells stained with tetramers or tested in ICS in a large number of studies. A.) represents H2K<sup>b</sup> & D<sup>b</sup>-restricted responses in B6 mice. B.) shows HLA-A2-restricted responses in humans. Number in parentheses is the frequency of positive donors. Arrows indicate direction of crossreactivity.

**Fig 2.** Unique IAV/EBV cross-reactivity in different HLA-A2+ patient groups suggests crossreactive patterns may be predicted during human infections. The arrow indicates the direction of crossreactivity i.e. (A) in culture EBVBMLF1 stimulates a strong proliferation of crossreactive IAV-M1-specific CD8 T cells. The size and color of the arrow indicate intensity of the crossreactive response. No. in brackets is the frequency of positive donors.

**A. Mouse Network of cross-reactivity**

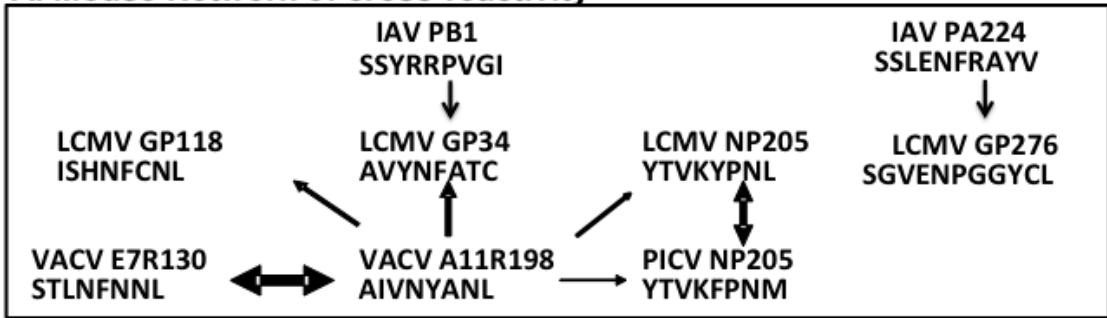

**B. Human Network of cross-reactivity**

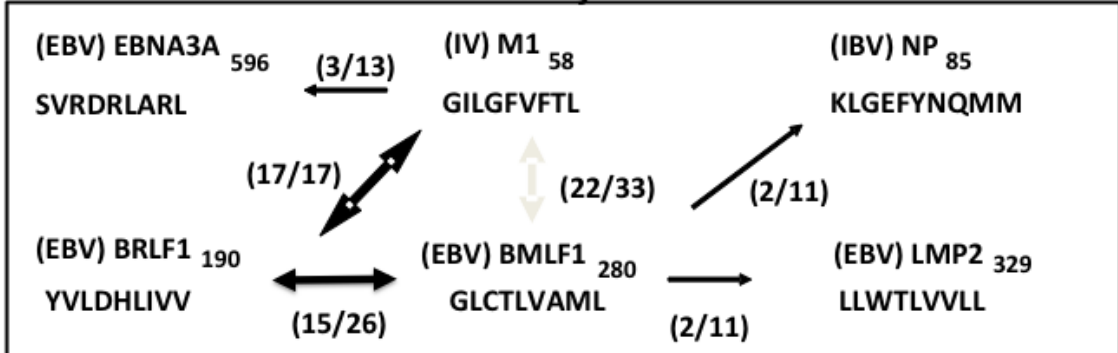

**DETRIMENTAL**

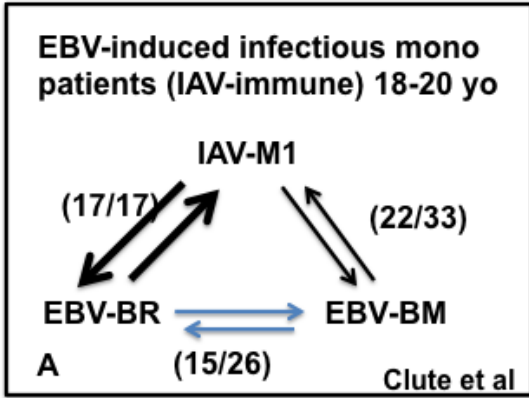

**PROTECTIVE?**

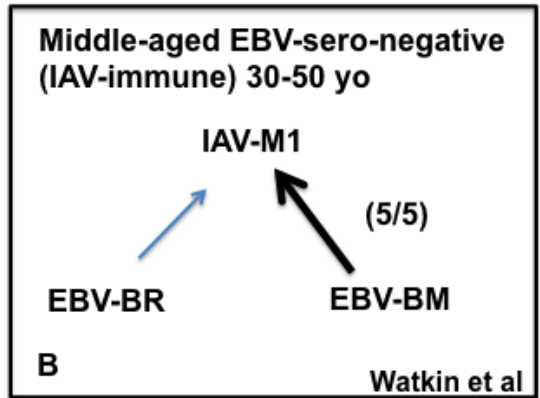

Supplement: supp_tru198_tru198supp.pdf [file supp_tru198_tru198supp.pdf]
